# Supplementary material for: Poly(ionic liquid) hydrogels exhibiting superior mechanical and electrochemical properties as flexible electrolytes
Source: Royal Society of Chemistry journal article supplement (doi:10.1039/c5ta08166a), 2015-12-02
Supplement: c5ta08166a1.pdf [file c5ta08166a1.pdf]

*Supporting Information for*

**Poly(Ionic Liquid)s Hydrogels Exhibiting Superior Mechanical and  
Electrochemical Properties as Flexible Electrolytes**

Tao Zhou<sup>a</sup>, Xinpei Gao<sup>a</sup>, Bin Dong<sup>b</sup>, Na Sun<sup>a</sup>, Liqiang Zheng<sup>\*a</sup>

*<sup>a</sup>Key laboratory of Colloid and Interface Chemistry, Shandong University, Ministry of  
Education, Jinan, 250100, P. R. China*

*<sup>b</sup>Dalian Institute of Chemical Physics, Chinese Academy of Sciences, Dalian, 116023,  
P. R. China*

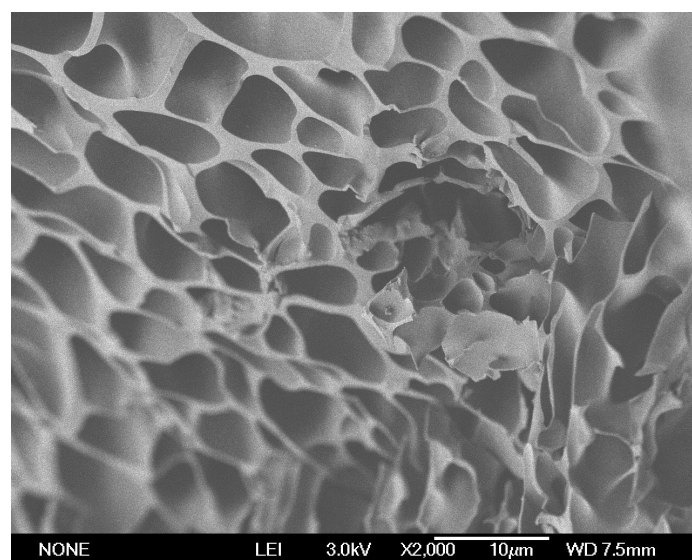

Figure S1 SEM picture of poly(ZIW/NaSS)s xerogels

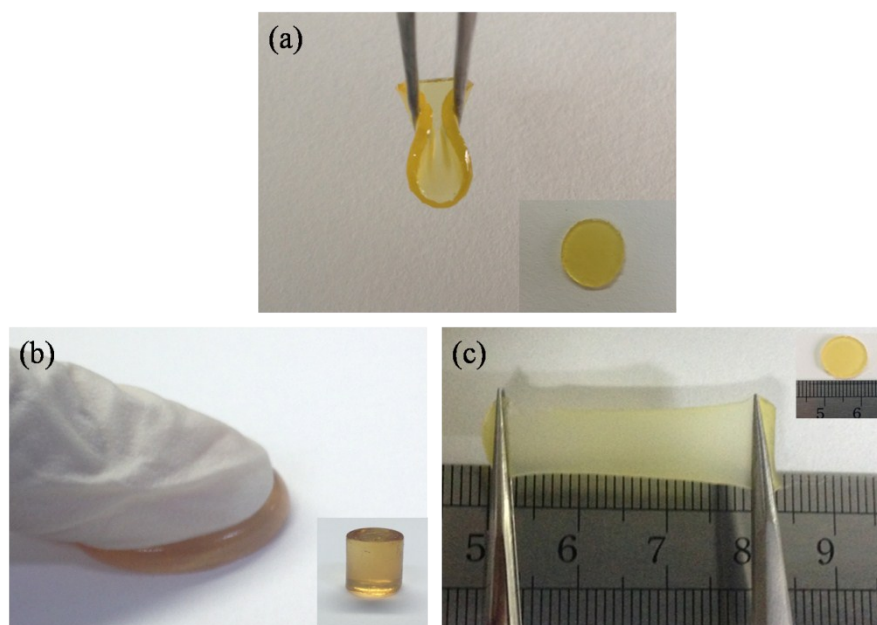

Figure S2 Pictures of poly(ZIW/AMPS)s hydrogels under deformations

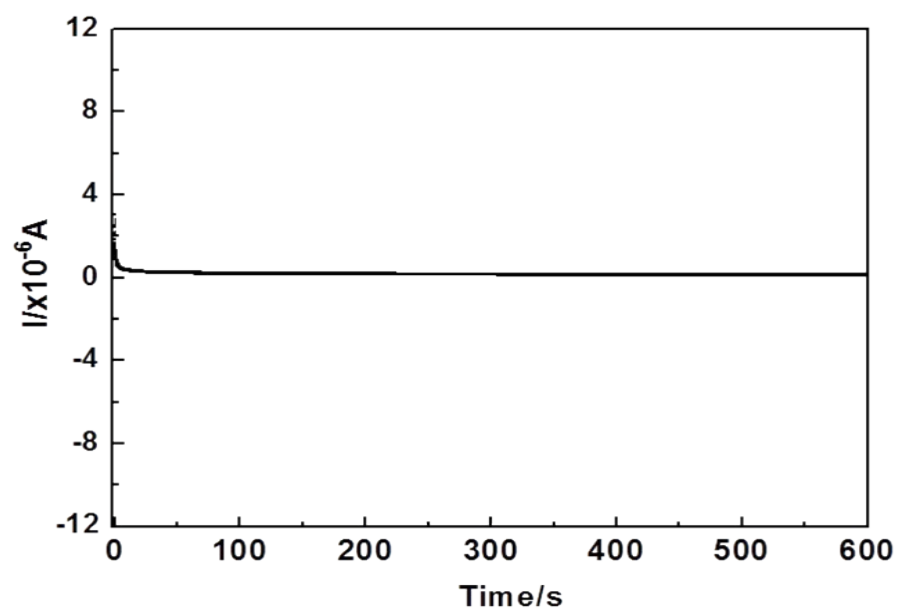

Figure. S3 Potentiostatic curves obtained at  $U= 0.3 \text{ V}$  for poly(ZIW/AMPS)s hydrogels.

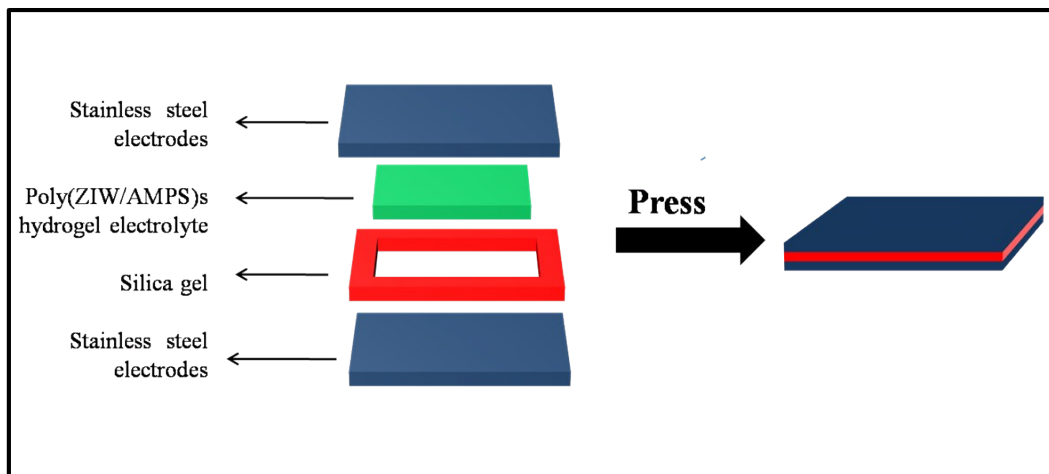

Figure S4 Schematic diagram of flexible devices for electrochemical measurements based on poly(ZIW/AMPS) hydrogel electrolytes.

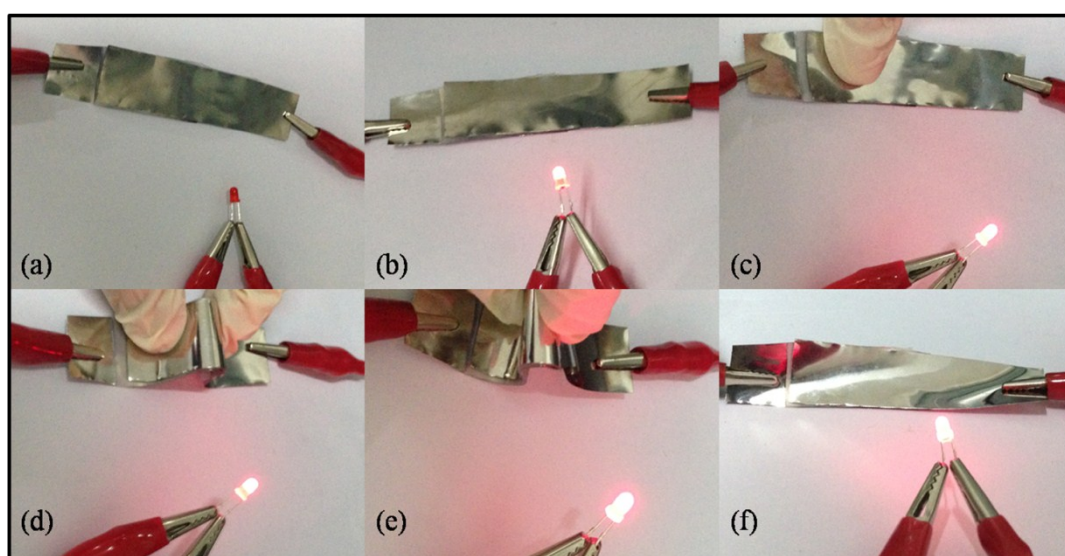

Figure S5 Circuit based on poly(ZIW/AMPS)s hydrogel electrolytes: (a, b) optical images of circuit based on poly(ZIW/AMPS)s hydrogel electrolytes at open and closed states; (c, d, e, f) the circuit functions well under compressed, bended, folded and twisted states.
